# Supplementary material for: Formation of Zn- and Fe-sulfides near hydrothermal vents at the Eastern Lau Spreading Center: implications for sulfide bioavailability to chemoautotrophs
Source: Springer Nature journal article supplement (doi:10.1186/1467-4866-9-6), 2008-05-19
Supplement: Additional file 1 [file 1467-4866-9-6-s1.pdf]

**Supplementary Table 1.** Locations and collection date of each vent fluid sample

| Station     | Sampling date | Sample ID     | Latitude       | Longitude       |
|-------------|---------------|---------------|----------------|-----------------|
| Kilo Moana  | Jun-12-05     | KM-154-2      | 20 3.232946 S  | 176 8.011579 W  |
|             | Jun-14-05     | KM-155-2      | 20 3.229245 S  | 176 8.007376 W  |
|             |               | KM-155-3      | 20 3.115110 S  | 176 8.096364 W  |
|             | Jun-15-05     | KM-156-1      | 20 3.235369 S  | 176 8.006933 W  |
|             |               | KM-156-3      | 20 3.236395 S  | 176 8.006927 W  |
| Jun-26-05   | KM-164-2      | 20 3.153036 S | 176 8.028189 W |                 |
| Tow Cam     | Jun-15-05     | TC-157-1      | 20 5.987972 S  | 176 8.182862 W  |
|             |               | TC-157-2      | 20 5.987292 S  | 176 8.183047 W  |
|             | Jun-17-05     | TC-159-1      | 20 5.998519 S  | 176 8.218040 W  |
|             |               | TC-159-2      | 20 5.998173 S  | 176 8.217600 W  |
| ABE         | Jun-18-05     | ABE-160-1     | 20 45.653674 S | 176 11.461254 W |
|             |               | ABE-160-2     | 20 45.653513 S | 176 11.445403 W |
|             |               | ABE-160-3     | 20 45.656731 S | 176 11.442188 W |
|             |               | ABE-160-4     | 20 45.931271 S | 176 11.580822 W |
| Tu'i Malila | Jun-21-05     | TM-161-1      | 21 59.358871 S | 176 34.048289 W |
|             |               | TM-161-2      | 21 59.405976 S | 176 34.135512 W |
|             |               | TM-161-3      | 21 59.355964 S | 176 34.067263 W |
|             |               | TM-161-4      | 21 59.277934 S | 176 34.063783 W |
